# Supplementary material
Source: PubMed Central journal article supplement (PMC2981441)
Supplement: NIHMS250456-supplement-01.pdf [file NIHMS250456-supplement-01.pdf]

**Supplementary Material**  
**Development of a Multicomponent Kinetic Assay of the Early Enzymes in the**  
***Campylobacter jejuni* N-Linked Glycosylation Pathway**

James P. Morrison<sup>a</sup>, Jerry M. Troutman<sup>a</sup>, and Barbara Imperiali<sup>a,b,\*</sup>

Departments of <sup>a</sup> Chemistry and <sup>b</sup> Biology, Massachusetts Institute of Technology, 77  
Massachusetts Avenue, Cambridge, Massachusetts 02139.

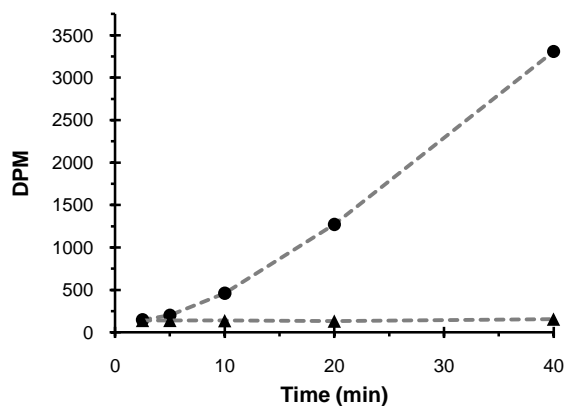

**Figure S1.** Initial activity of PglF, PglE, PglD, PglC, PglA assay with UndP (circles) and without UndP (triangles) measured with the lipophilicity-based assay (1% Triton X-100, 709 nM PglF, 2.39  $\mu$ M PglE, 2.46  $\mu$ M PglD, 400 nM PglC, 444 nM PglA).

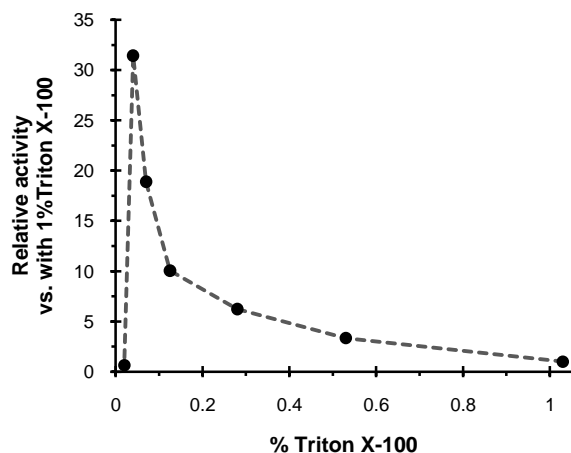

**Figure S2.** The effect of Triton X-100 on activity of PglF, PglE, PglD, PglC, PglA, DGK relative to the activity observed with 1.03% Triton X-100. Maximum activity is observed at 0.04% Triton X-100, near the critical micelle concentration of this detergent. Initial rates calculated from the slope of the linear phase of reaction progression (after the initial lag phase).

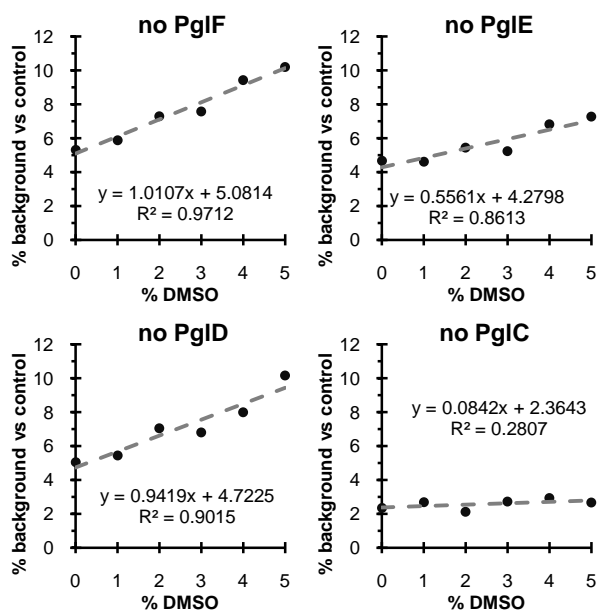

**Figure S3.** The effect of DMSO on background activity of the PglF, PglE, PglD, PglC, PglA, DGK assay. Transfer of radioactivity to the organic phase observed in absence of PglF, PglE, PglD or PglC is considered background activity. Background activity increases with DMSO concentration in the absence of either PglF, PglE or PglD, but not in the absence of PglC. Background activity when PglA or DGK was removed was nearly identical to observations when PglC was removed; no increase in background activity with DMSO concentration was observed (data not shown).
